# Supplementary material for: Awareness of and willingness to use pre-exposure prophylaxis (PrEP) among people who inject drugs and men who have sex with men in India: Results from a multi-city cross-sectional survey
Source: PubMed Central journal article supplement (PMC7906475; doi:10.1371/journal.pone.0247352), 2021-02-25

Supplemental Figure 1: Awareness about oral PrEP in 12 PWID sites (a) and in 10 MSM sites (b)

(a)

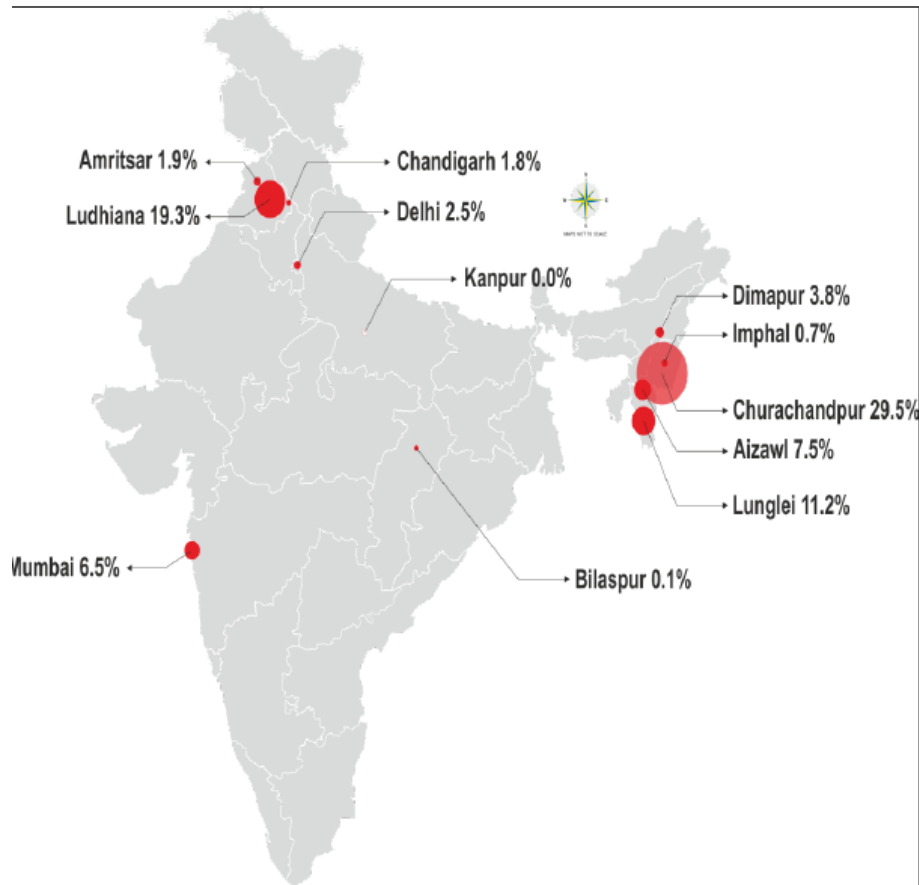

(b)

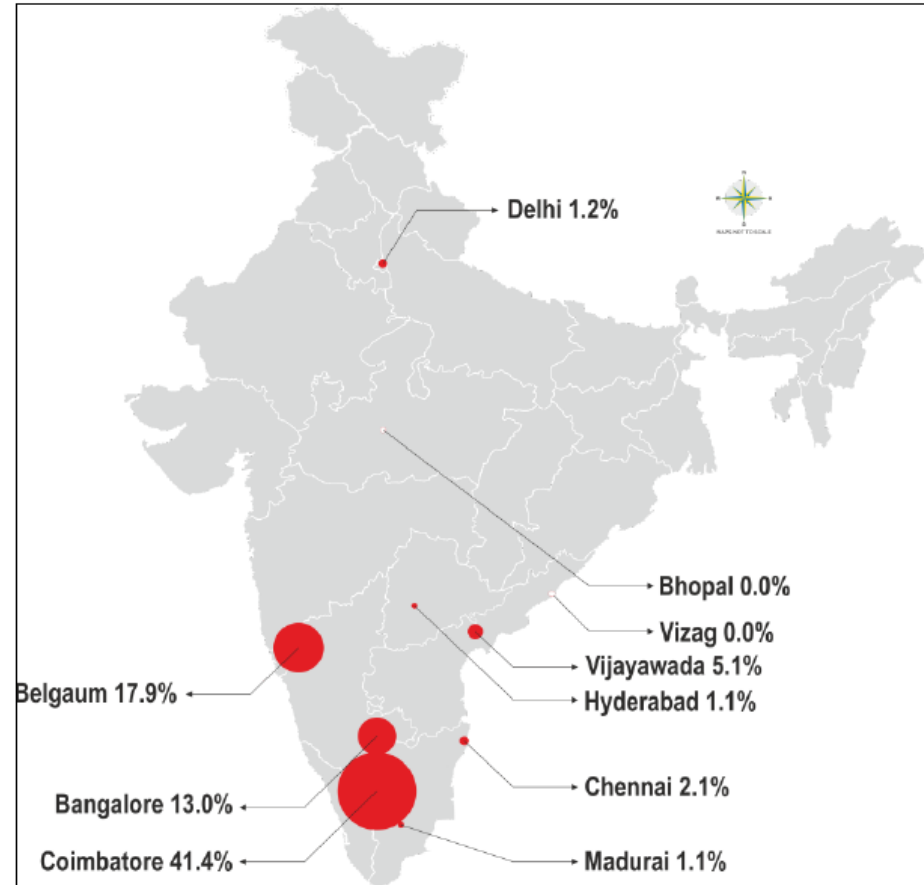

Supplement: pone.0247352.s002.pdf [file pone.0247352.s002.pdf]
